# Supplementary material for: Soil microbiome dynamics of Cannabis sativa L. under biotic stress induced by Tetranychus urticae
Source: Research Square preprint supplement (doi:10.21203/rs.3.rs-7545648/v1), 2025-09-19
Supplement: Supplementary file 1 [file 92d6af8affbd6fe24da11fec.docx]

**Soil microbiome dynamics of *Cannabis sativa L*. under biotic stress induced by *Tetranychus urticae*.**

Pinto Alman L.¹*, De Urraza P. ³, Coppotelli B.², Colman D.², Bernardo V.⁴, Ruscitti M.⁴, Vaccarini C.¹, Bugvila C.¹, Sedán D.¹, Andrinolo D.¹

¹ Environmental Research Center (CIM), CONICET – National University of La Plata (UNLP), Buenos Aires, Argentina

² Research and Development Center for Industrial Fermentations (CINDEFI), CONICET, Buenos Aires, Argentina

³ General Microbiology, Department of Biological Sciences, Faculty of Exact Sciences, National University of La Plata (UNLP), Buenos Aires, Argentina

⁴ Plant Physiology Institute (INFIVE), CONICET – National University of La Plata (UNLP), Buenos Aires, Argentina

*Corresponding author: [lucaspintoalman@gmail.com](mailto:lucaspintoalman@gmail.com)

**Supplementary Material**

**Fig. 1** - Shannon index of microenvironments under Control and Stress treatments.


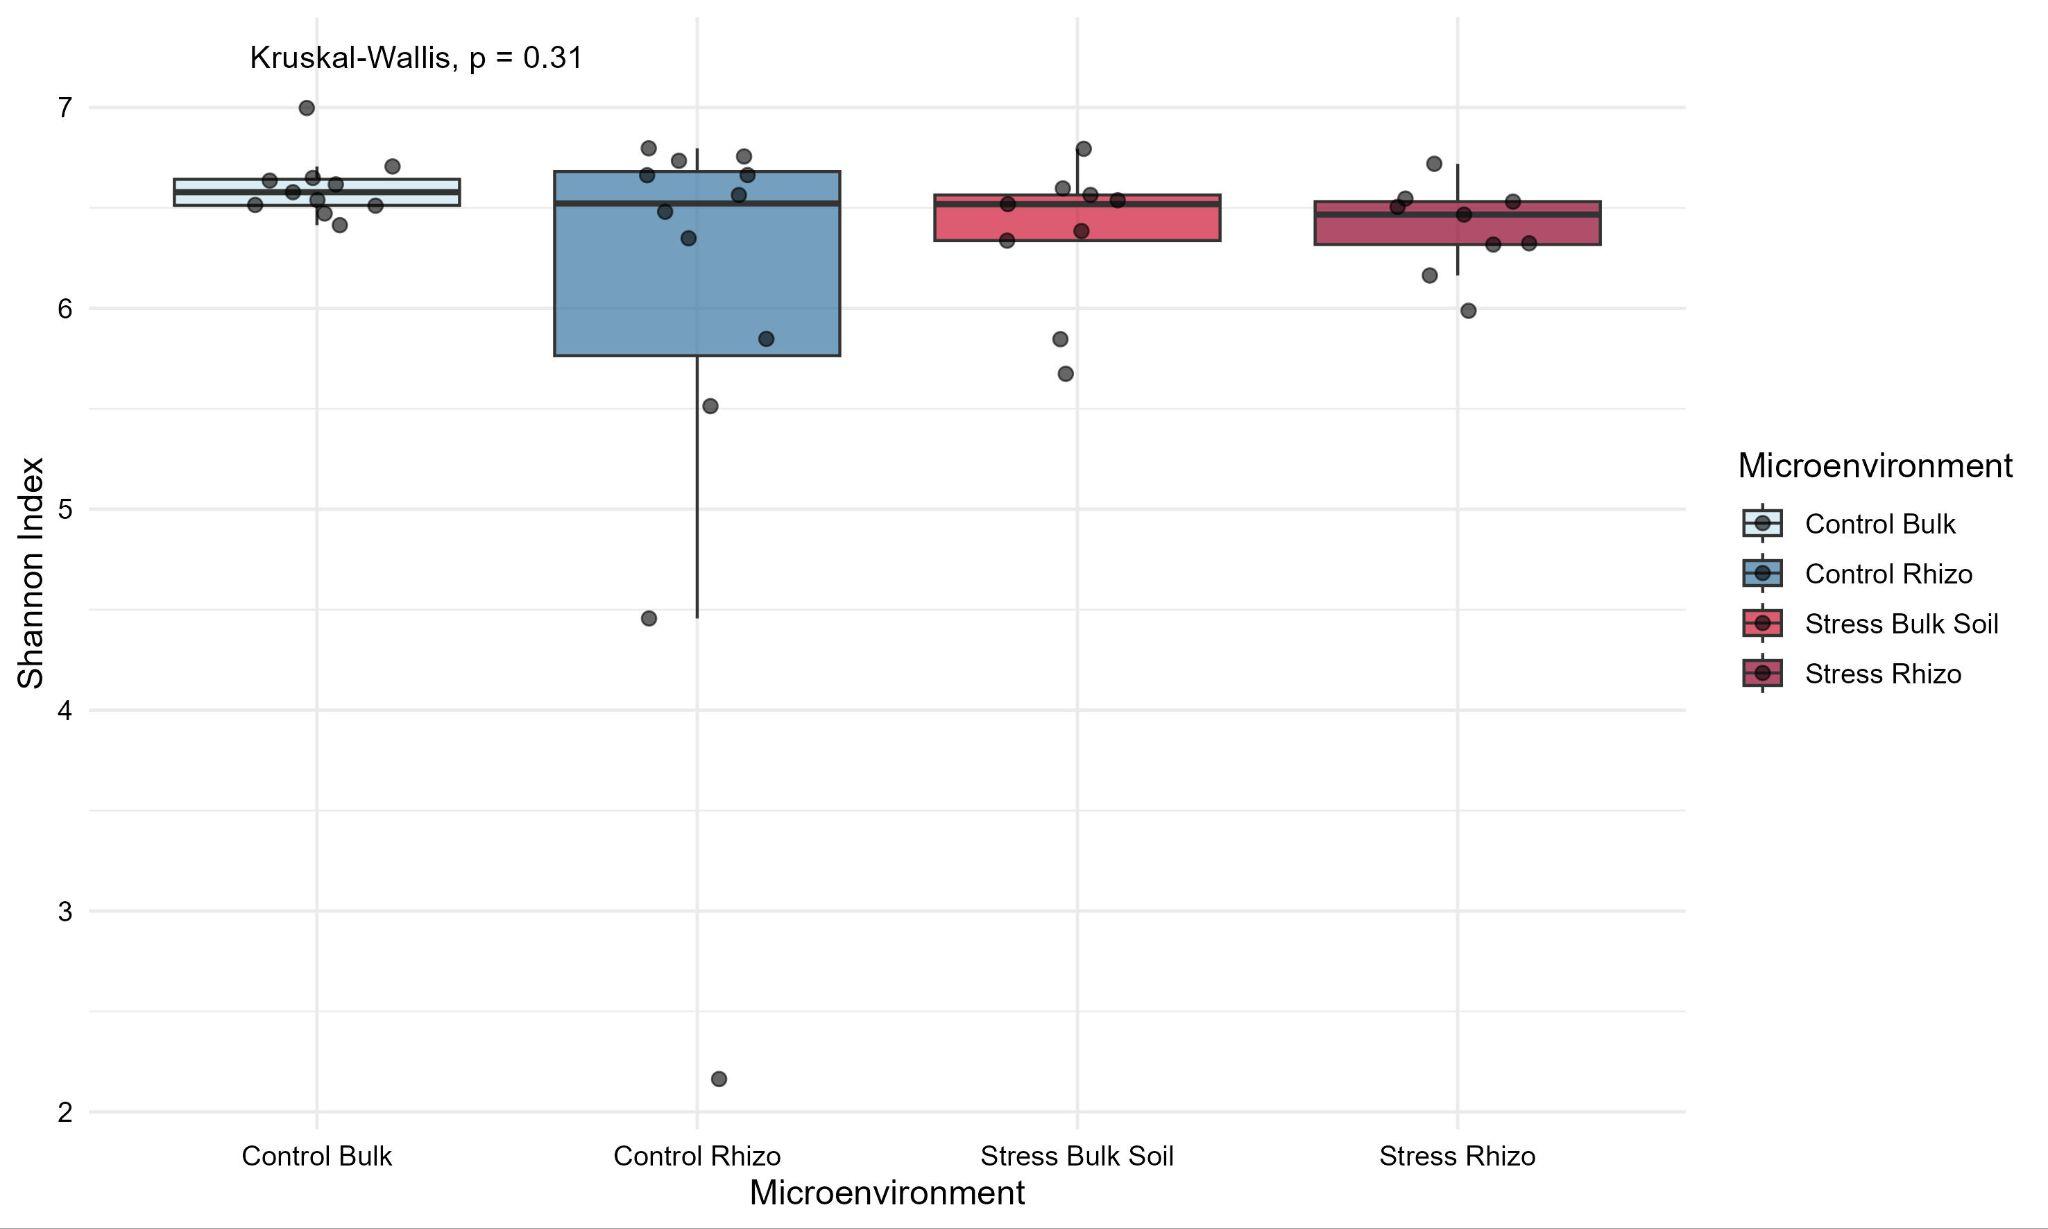


**Fig. 2.** Shannon index throughout the three life cycle stages


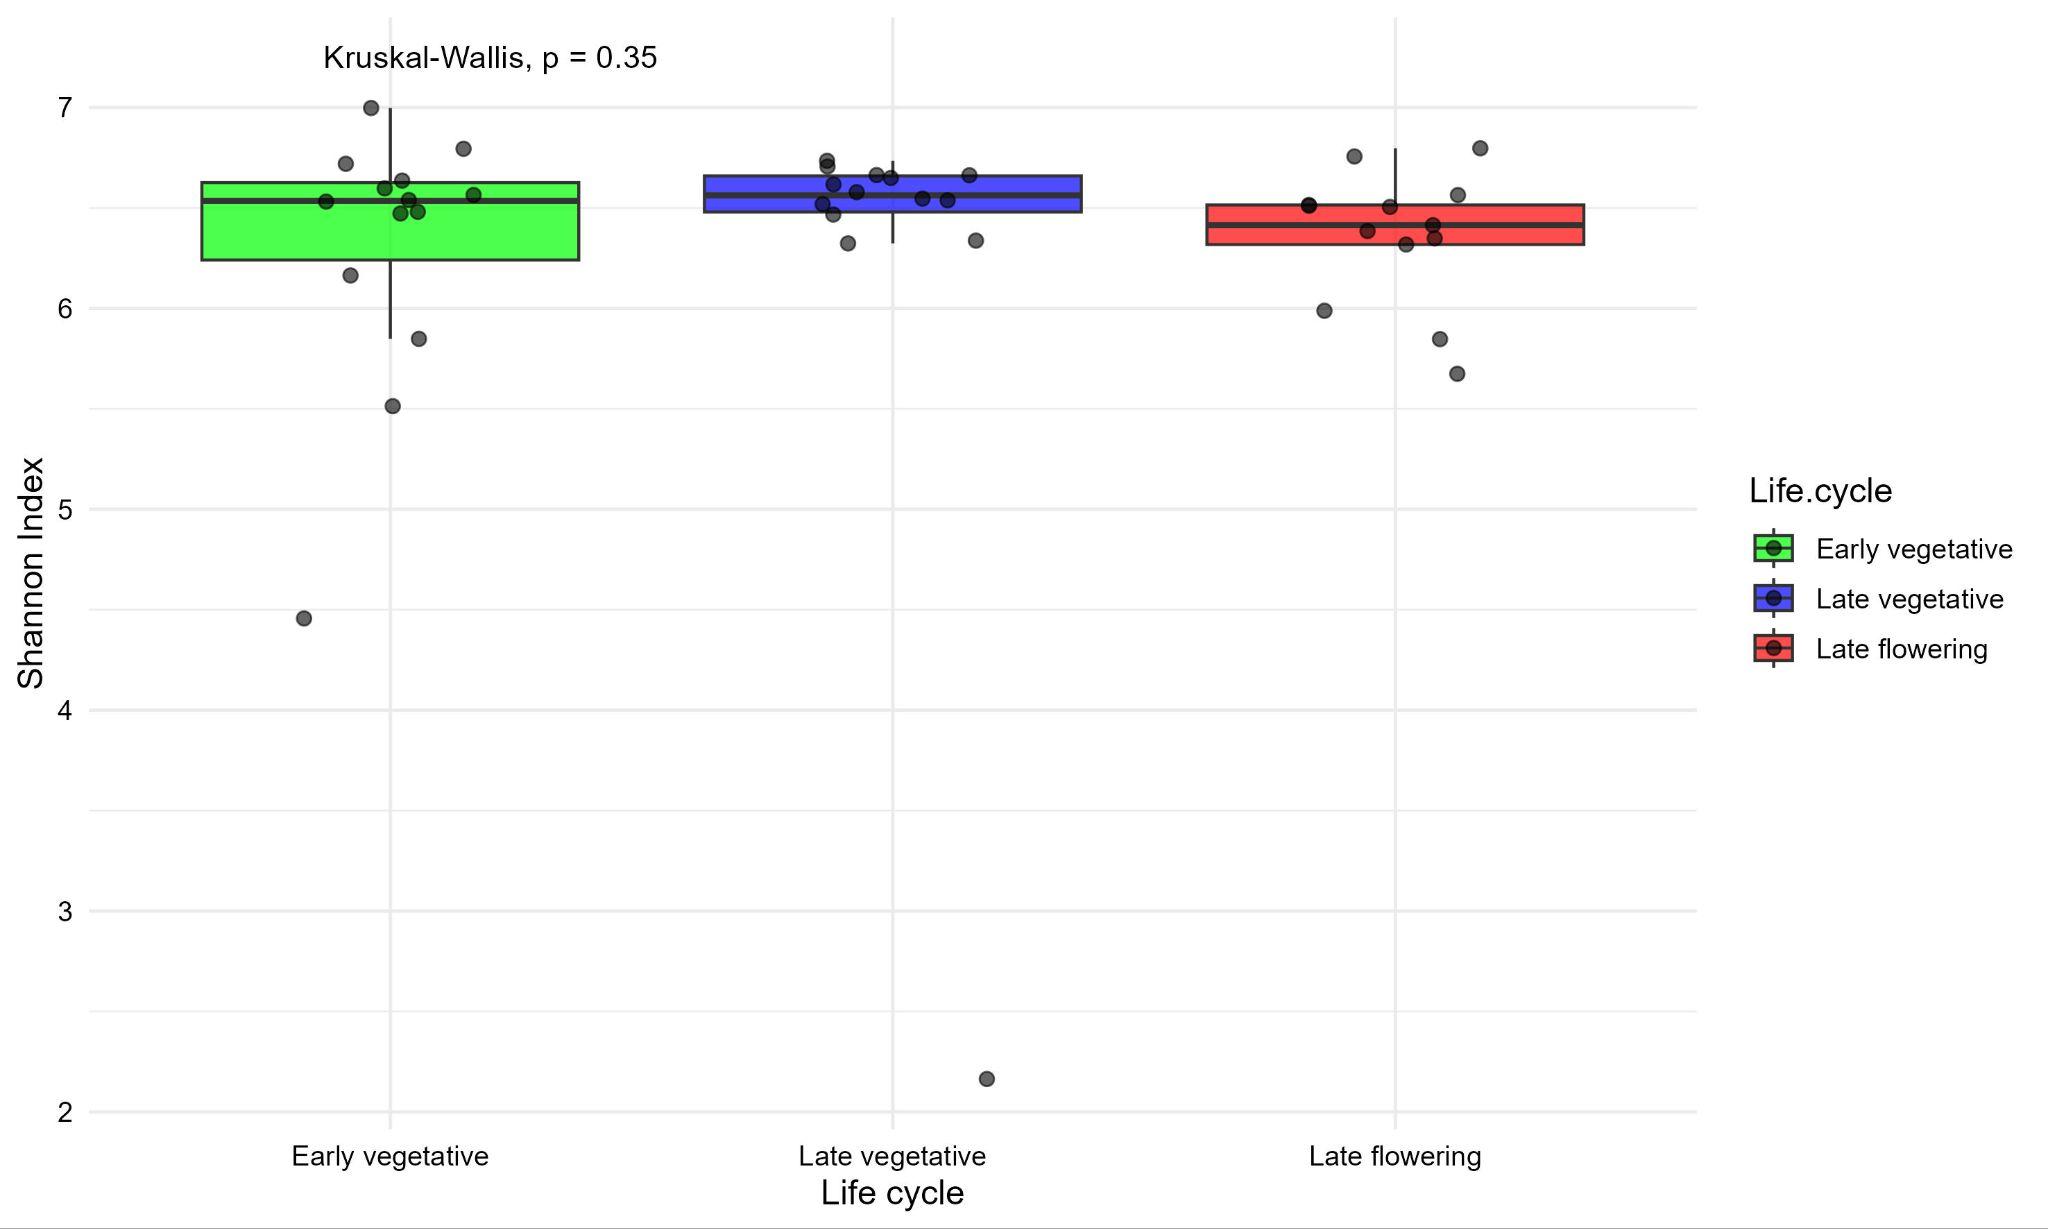


**Table 1** – Genus-level LEfSe analysis differentiating control and stress treatments in distinct microenvironments. The top 15 taxa based on LDA score are presented.

| **Taxa** | **Enrich_group** | **ef_lda** | **pvalue** | **padj** |
| --- | --- | --- | --- | --- |
| Pseudomonas | Control Rhizo | 3,934 | 0,0228 | 0,0228 |
| Gemmatimonadaceae_uncultured | Stress Rhizo | 3,915 | 0,0096 | 0,0096 |
| BIrii41 | Control Bulk | 3,839 | 0,0376 | 0,0376 |
| S0134_terrestrial_group | Control Bulk | 3,822 | 0,0167 | 0,0167 |
| Lacunisphaera | Stress Bulk Soil | 3,772 | 0,0437 | 0,0437 |
| Unknown | Control Bulk | 3,658 | 0,0025 | 0,0025 |
| Rhodothermaceae_uncultured | Control Bulk | 3,582 | 0,0074 | 0,0074 |
| MND1 | Control Bulk | 3,549 | 0,0234 | 0,0234 |
| Delftia | Control Rhizo | 3,542 | 0,0084 | 0,0084 |
| TRA3-20 | Control Bulk | 3,406 | 0,0023 | 0,0023 |
| IS-44 | Control Bulk | 3,346 | 0,0240 | 0,0240 |
| Flavobacteriaceae_Unknown | Control Bulk | 3,342 | 0,0407 | 0,0407 |
| Rhizobiaceae_Unknown | Control Rhizo | 3,337 | 0,0229 | 0,0229 |
| BD2-11_terrestrial_group | Control Bulk | 3,331 | 0,0123 | 0,0123 |
| PAUC26f | Control Bulk | 3,327 | 0,0021 | 0,0021 |

**Table 2** – Genus-level LEfSe analysis across developmental stages. The top 15 taxa based on LDA score are presented.

| **Taxa** | **Enrich_group** | **ef_lda** | **pvalue** | **padj** |
| --- | --- | --- | --- | --- |
| Rhodanobacter | early vegetative | 4.559 | 0.0001 | 0.0001 |
| Sandaracinaceae_uncultured | late flowering | 4.237 | 6.5E-05 | 6.5E-05 |
| Vicinamibacterales_uncultured_uncultured | late vegetative | 4.079 | 0.0021 | 0.0021 |
| Iamia | late flowering | 3.956 | 3.3E-06 | 3.3E-06 |
| Microscillaceae_uncultured | late flowering | 3.934 | 0.0086 | 0.0086 |
| Gemmatimonadaceae_uncultured | late flowering | 3.837 | 0.0251 | 0.0251 |
| Hirschia | late flowering | 3.781 | 1.5E-05 | 1.5E-05 |
| Unknown_Unknown_Unknown_Unknown_Unknown | early vegetative | 3.772 | 0.0082 | 0.0082 |
| Steroidobacter | late flowering | 3.656 | 1.7E-05 | 1.7E-05 |
| Vicinamibacteraceae | late vegetative | 3.606 | 0.0163 | 0.0163 |
| Pedosphaeraceae_uncultured | early vegetative | 3.593 | 0.0014 | 0.0014 |
| Lacunisphaera | late flowering | 3.572 | 0.0283 | 0.0283 |
| Granulicella | early vegetative | 3.561 | 0.0009 | 0.0009 |
| Anaerolineaceae_uncultured | late flowering | 3.532 | 0.0021 | 0.0021 |
| Rhodobacteraceae_Unknown | late flowering | 3.494 | 6.4883E-06 | 6.48E-06 |

**Fig.** **3** - Lefse analysis at family level evaluating control and stress treatments and microenvironments. The top 15 taxa based on LDA score are presented.


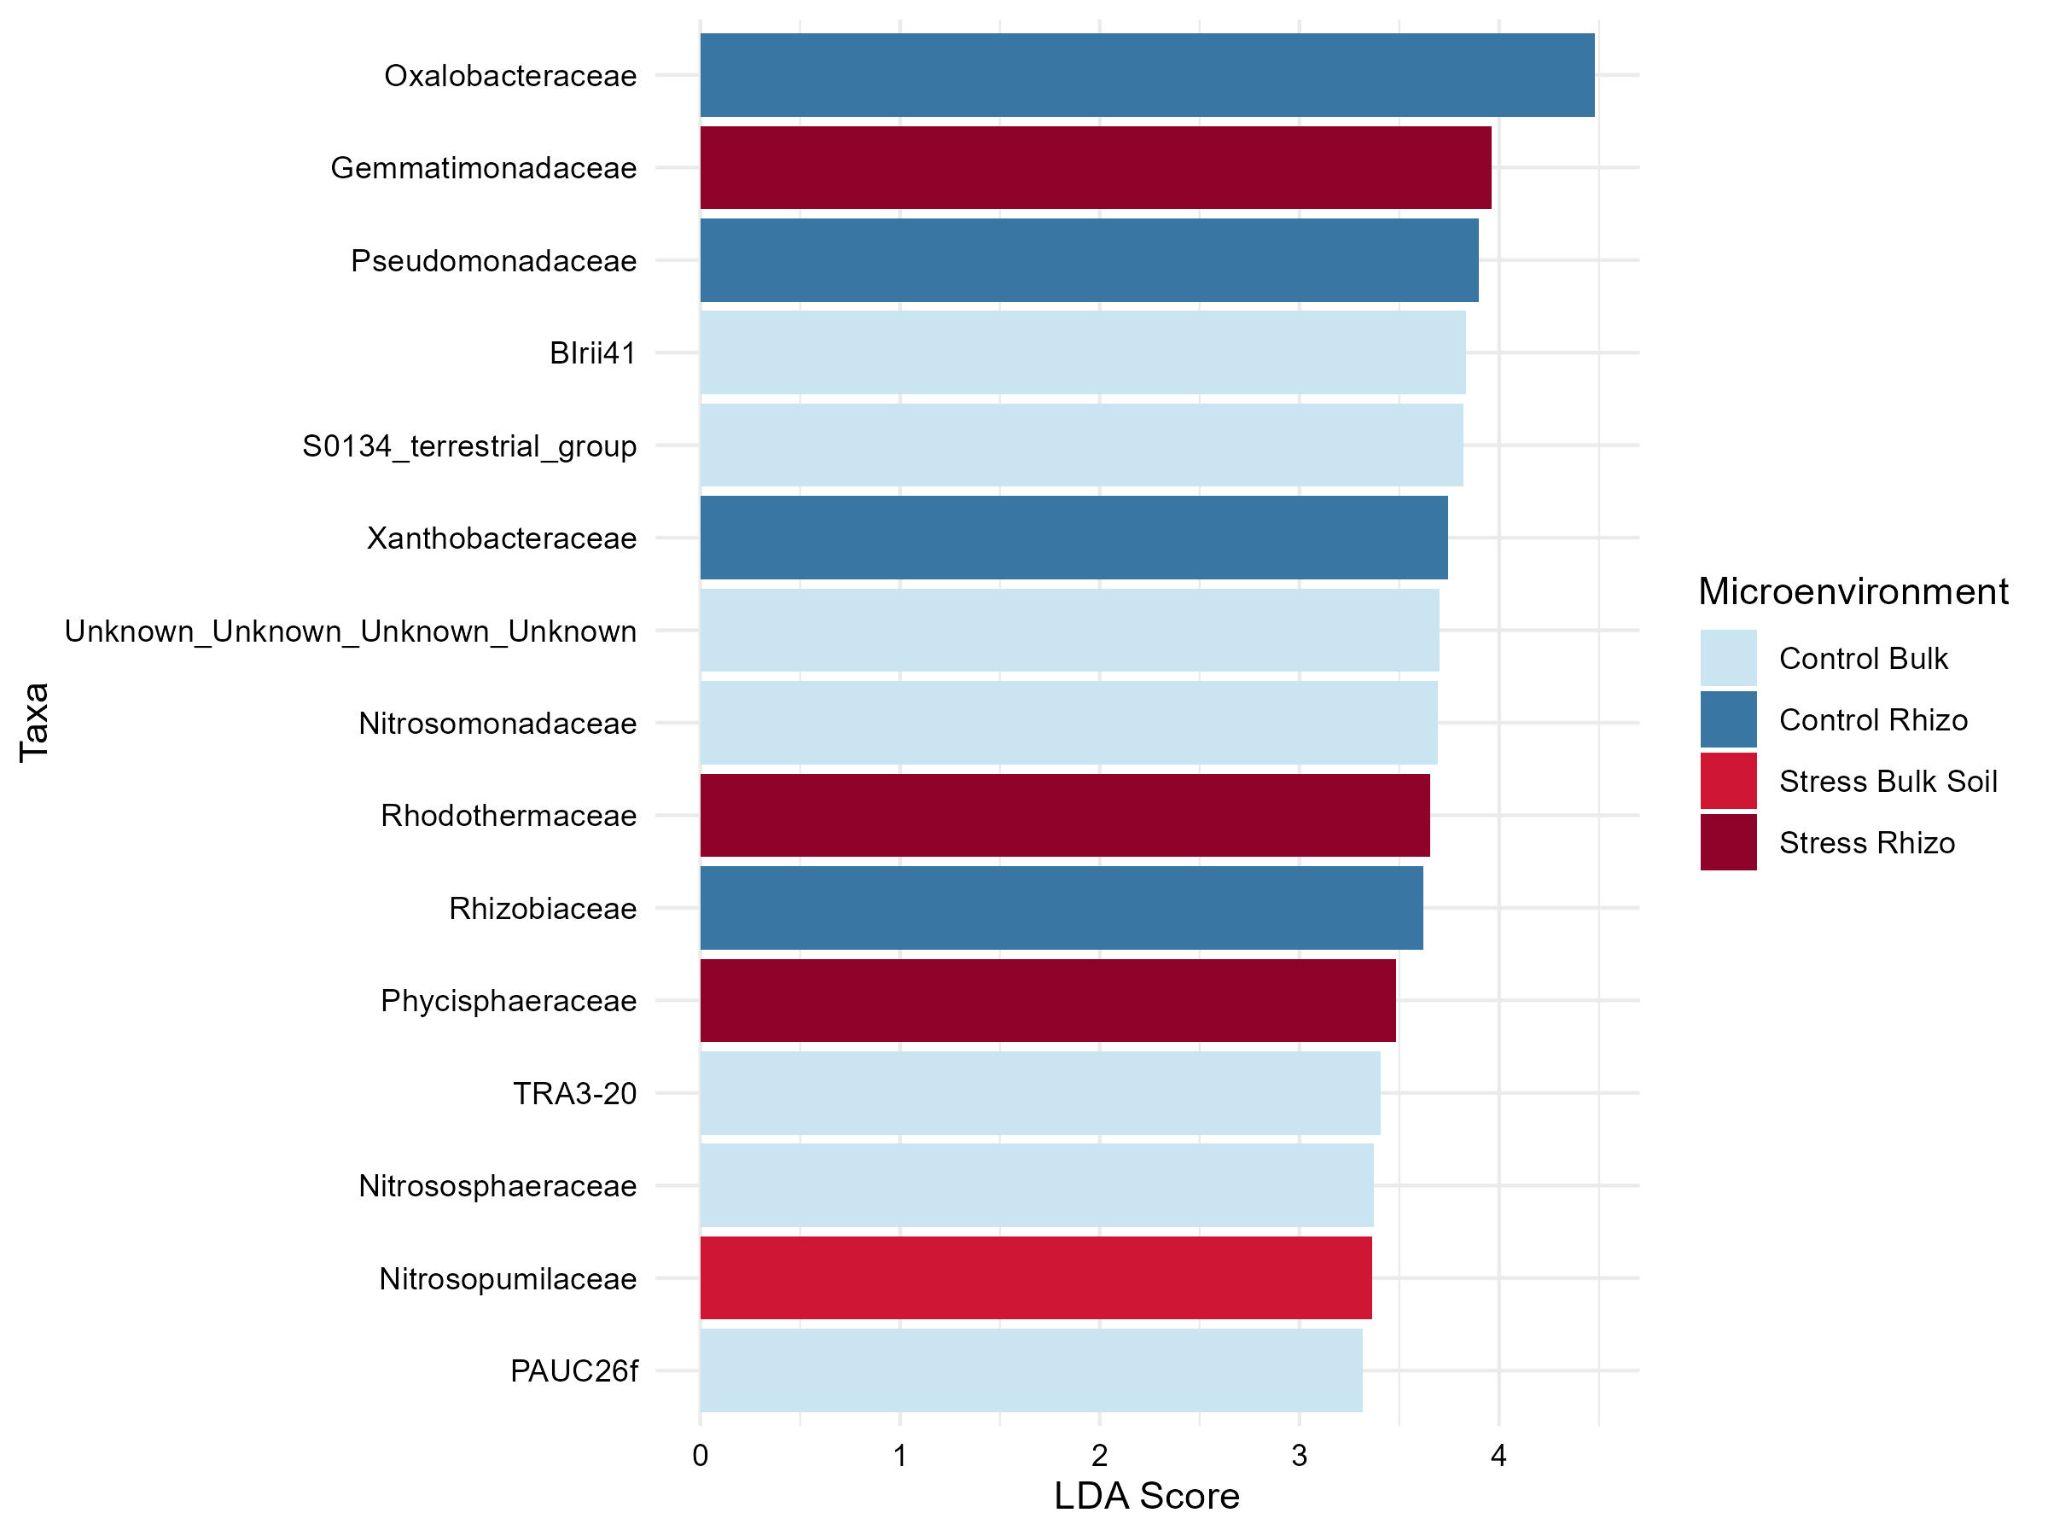


**Table 3** – Family-level LEfSe analysis differentiating control and stress treatments in distinct microenvironments. The top 15 taxa based on LDA score are presented.

| **Taxa** | **Enrich_group** | **ef_lda** | **pvalue** | **padj** |
| --- | --- | --- | --- | --- |
| Oxalobacteraceae | Control Rhizo | 4.389 | 0.0423 | 0.0423 |
| Gemmatimonadaceae | Stress Rhizo | 3.989 | 0.0116 | 0.0116 |
| Pseudomonadaceae | Control Rhizo | 3.975 | 0.0228 | 0.0228 |
| BIrii41 | Control Bulk | 3.860 | 0.037 | 0.037 |
| S0134_terrestrial_group | Control Bulk | 3.846 | 0.0167 | 0.0167 |
| Xanthobacteraceae | Control Rhizo | 3.801 | 0.0425 | 0.0425 |
| Nitrosomonadaceae | Control Bulk | 3.740 | 0.0313 | 0.0313 |
| Rhizobiaceae | Control Rhizo | 3.681 | 0.0190 | 0.0190 |
| Rhodothermaceae | Stress Rhizo | 3.673 | 0.0087 | 0.0087 |
| Unknown_Unknown_Unknown_Unknown | Control Bulk | 3.649 | 0.0025 | 0.0025 |
| Phycisphaeraceae | Stress Rhizo | 3.483 | 0.0209 | 0.0209 |
| TRA3-20 | Control Bulk | 3.428 | 0.0023 | 0.0023 |
| Nitrosopumilaceae | Stress Bulk Soil | 3.377 | 0.048 | 0.048 |
| Nitrososphaeraceae | Control Bulk | 3.361 | 0.0034 | 0.0034 |
| PAUC26f | Control Bulk | 3.358 | 0.0021 | 0.0021 |

**Fig. 4** – Lefse analysis at family level across lifecycle. The top 15 taxa based on LDA score are presented.


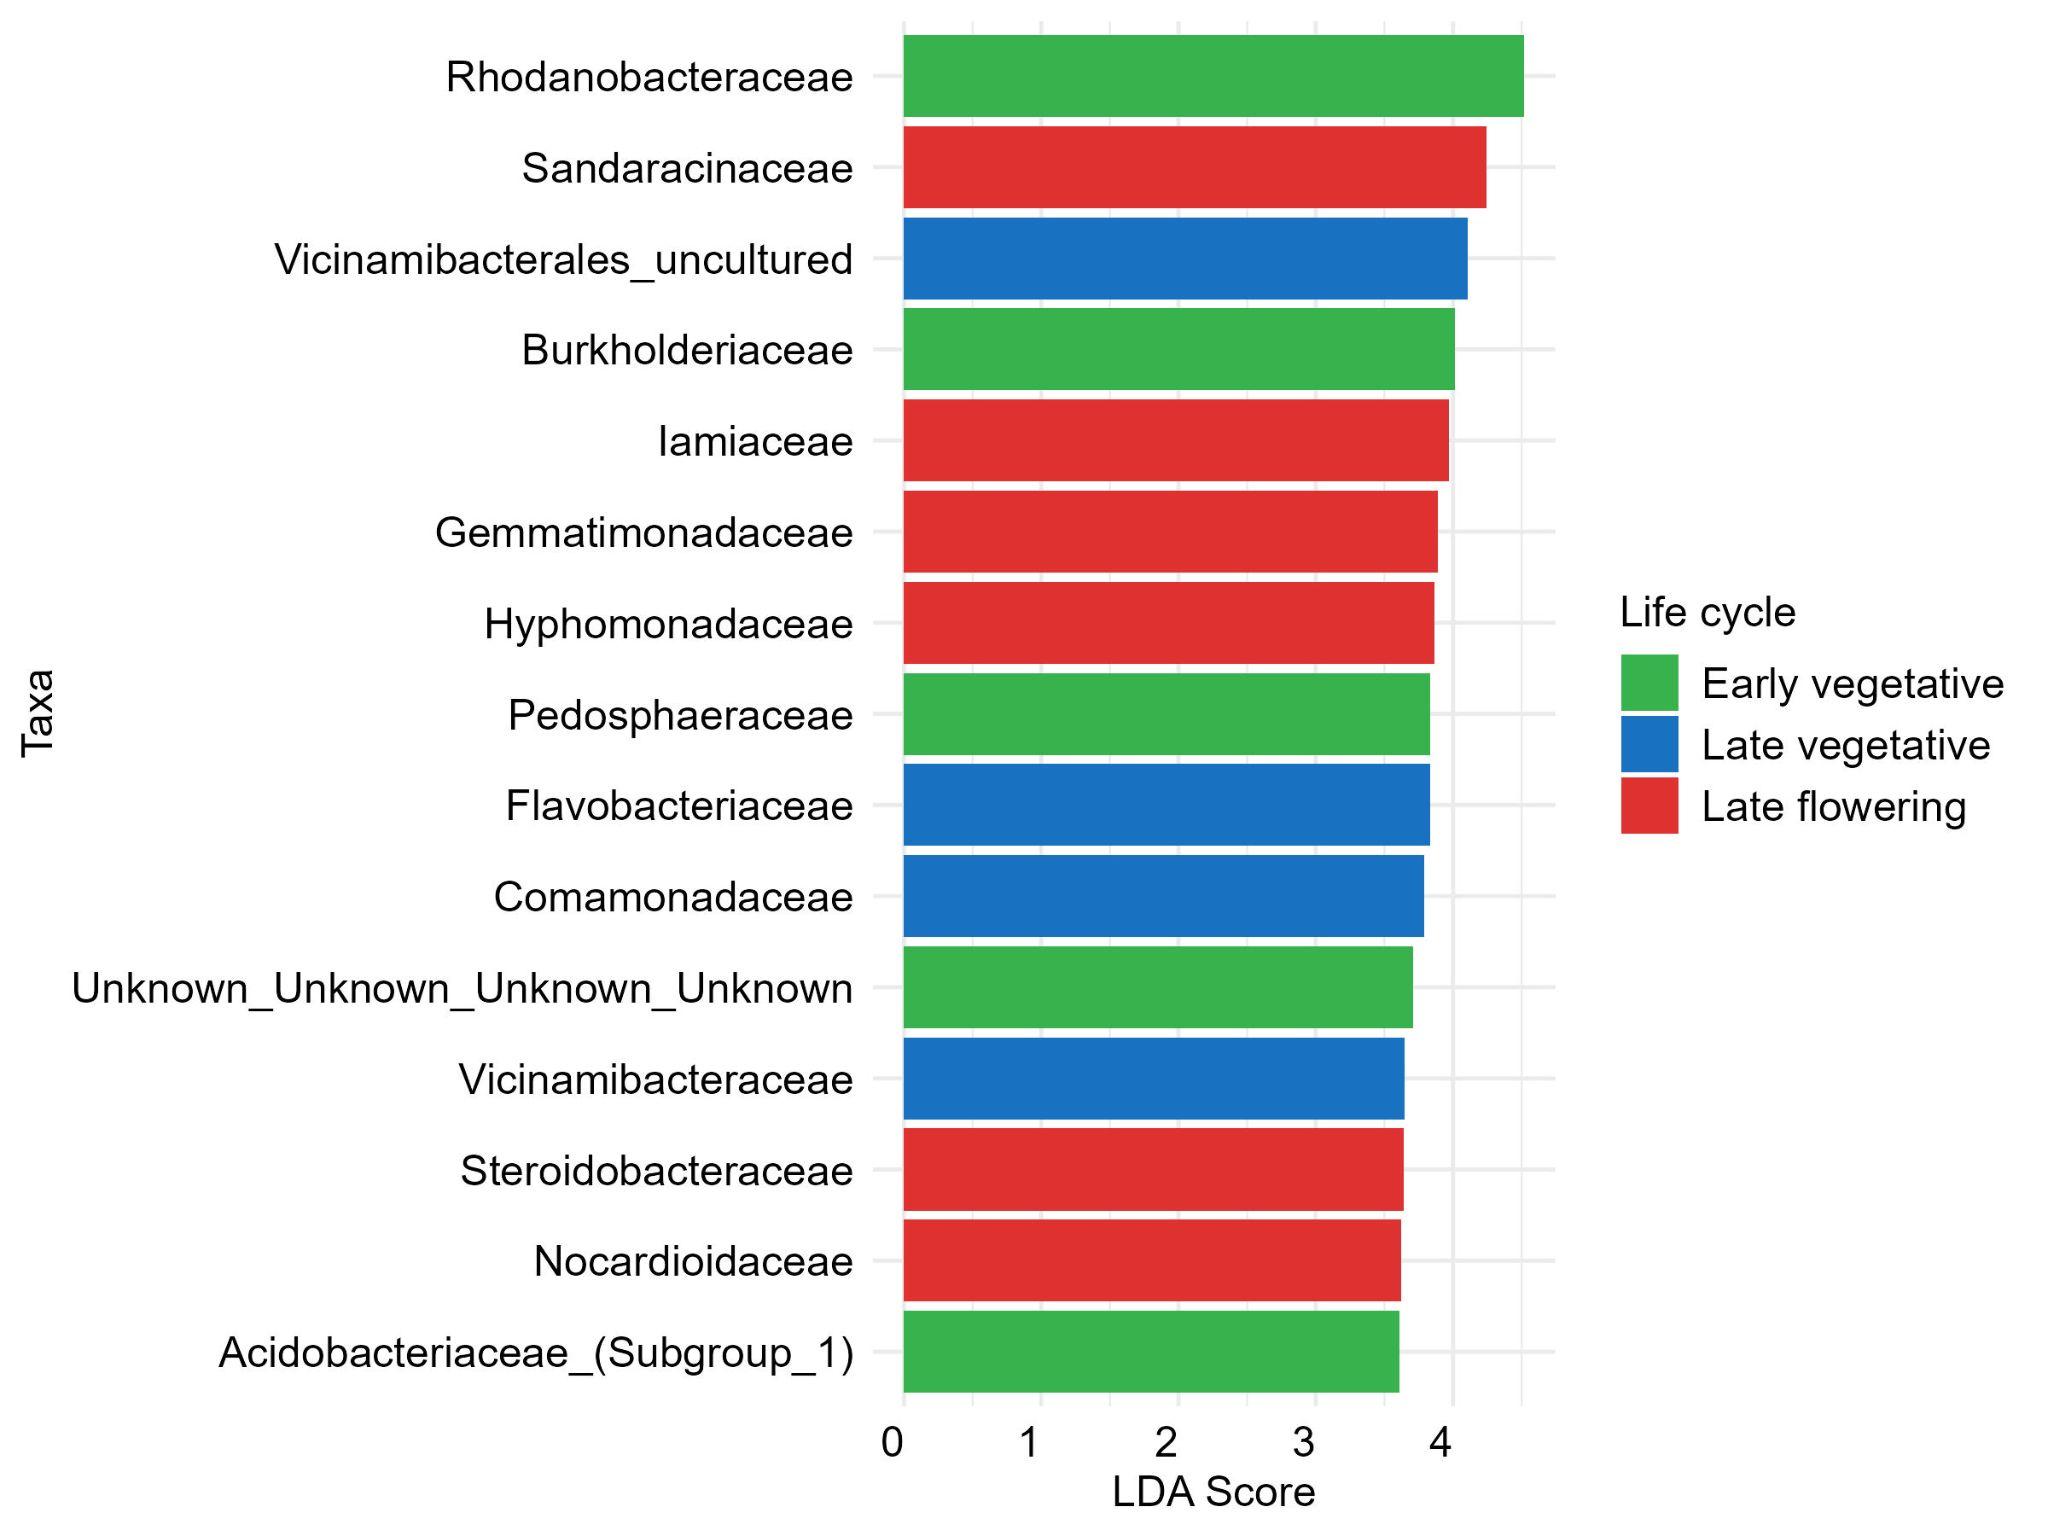


**Table 4** - Lefse analysis at family level across life cycle. The top 15 taxa based on LDA score are presented.

| **Taxa** | **Enrich_group** | **ef_lda** | **pvalue** | **padj** |
| --- | --- | --- | --- | --- |
| Rhodanobacteraceae | early vegetative | 4.509 | 0.0007 | 0.0007 |
| Sandaracinaceae | late flowering | 4.245 | 5.69E-05 | 5.69E-05 |
| Vicinamibacterales_uncultured | late vegetative | 4.108 | 0.0021 | 0.0021 |
| Iamiceae | late flowering | 3.988 | 3.33E-06 | 3.33E-06 |
| Burkholderiaceae | early vegetative | 3.976 | 0.023 | 0.023 |
| Gemmatimonadaceae | late flowering | 3.952 | 0.019 | 0.019 |
| Hyphomondaceae | late flowering | 3.854 | 4.087Ee-05 | 4.087Ee-05 |
| Pedosphaeraceae | early vegetative | 3.839 | 0.0002 | 0.0002 |
| Comamonadaceae | late vegetative | 3.785 | 0.0016 | 0.0016 |
| Nocardiiodaceae | late flowering | 3.768 | 0.0368 | 0.0368 |
| Flavobacteriaceae | late vegetative | 3.750 | 0.0094 | 0.0094 |
| Unknown | early vegetative | 3.747 | 0.0082 | 0.0082 |
| Vicinamibacteraceae | late vegetative | 3.672 | 0.0144 | 0.0144 |
| Acidobacteriaceae_(Subgroup_1) | early vegetative | 3.623 | 1.70E-05 | 1.70E-05 |

**Fig. 5.**Ternary plots comparing the Control group (top) and the Biotic Stress group (bottom) at genus level. Each point represents a genus with relative abundance >1% in at least one developmental stage. **
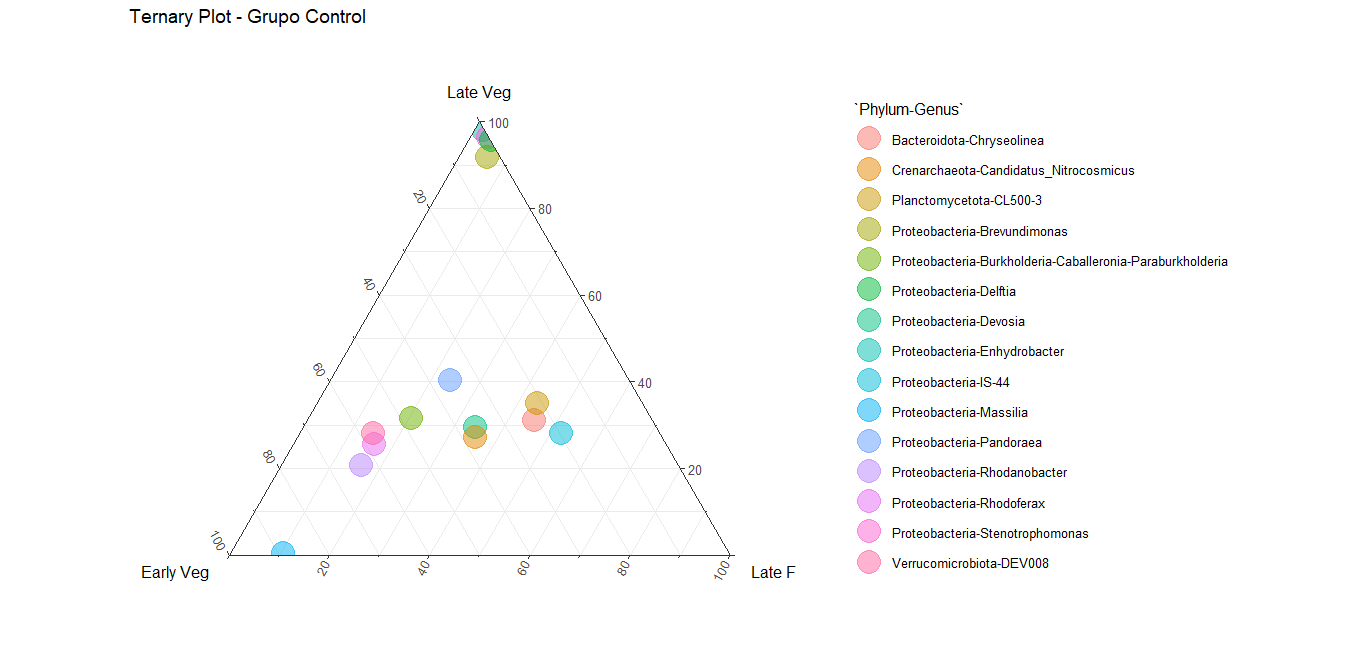
** **
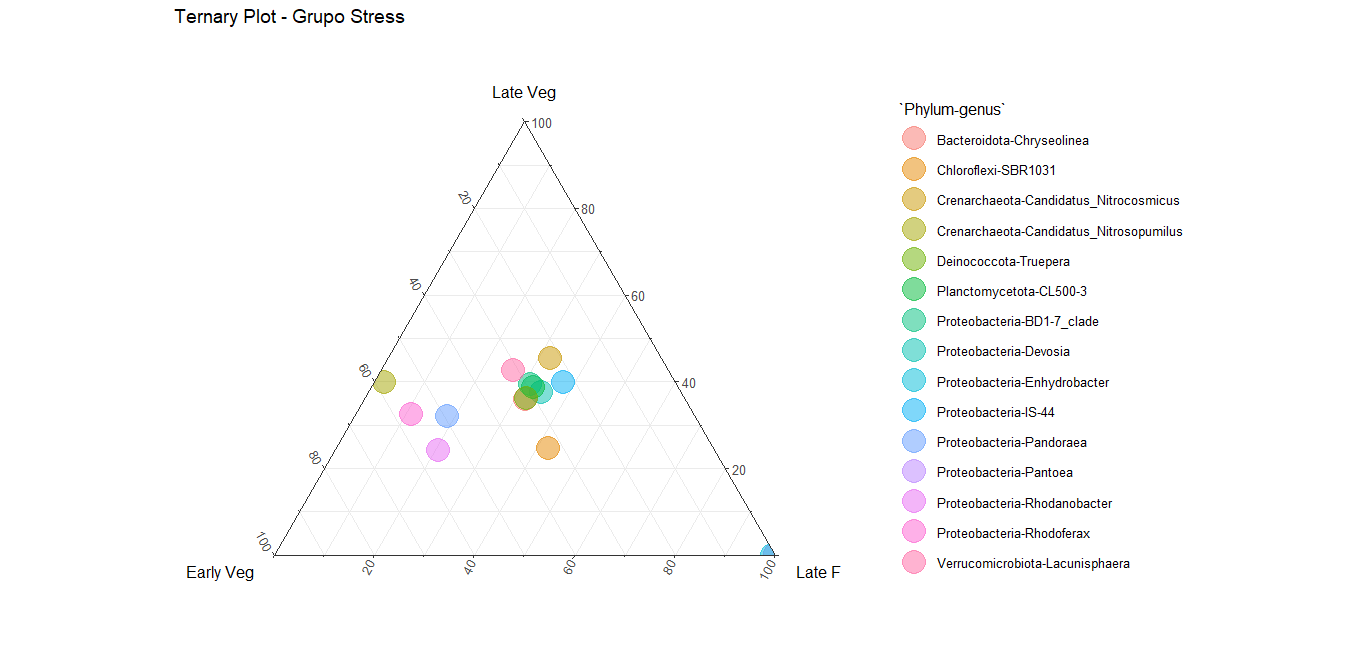
**

**Fig. 6.** Heatmap of Picrust analysis comparing differential KOs between control and stress in bulk soil and rhizosphere.

**
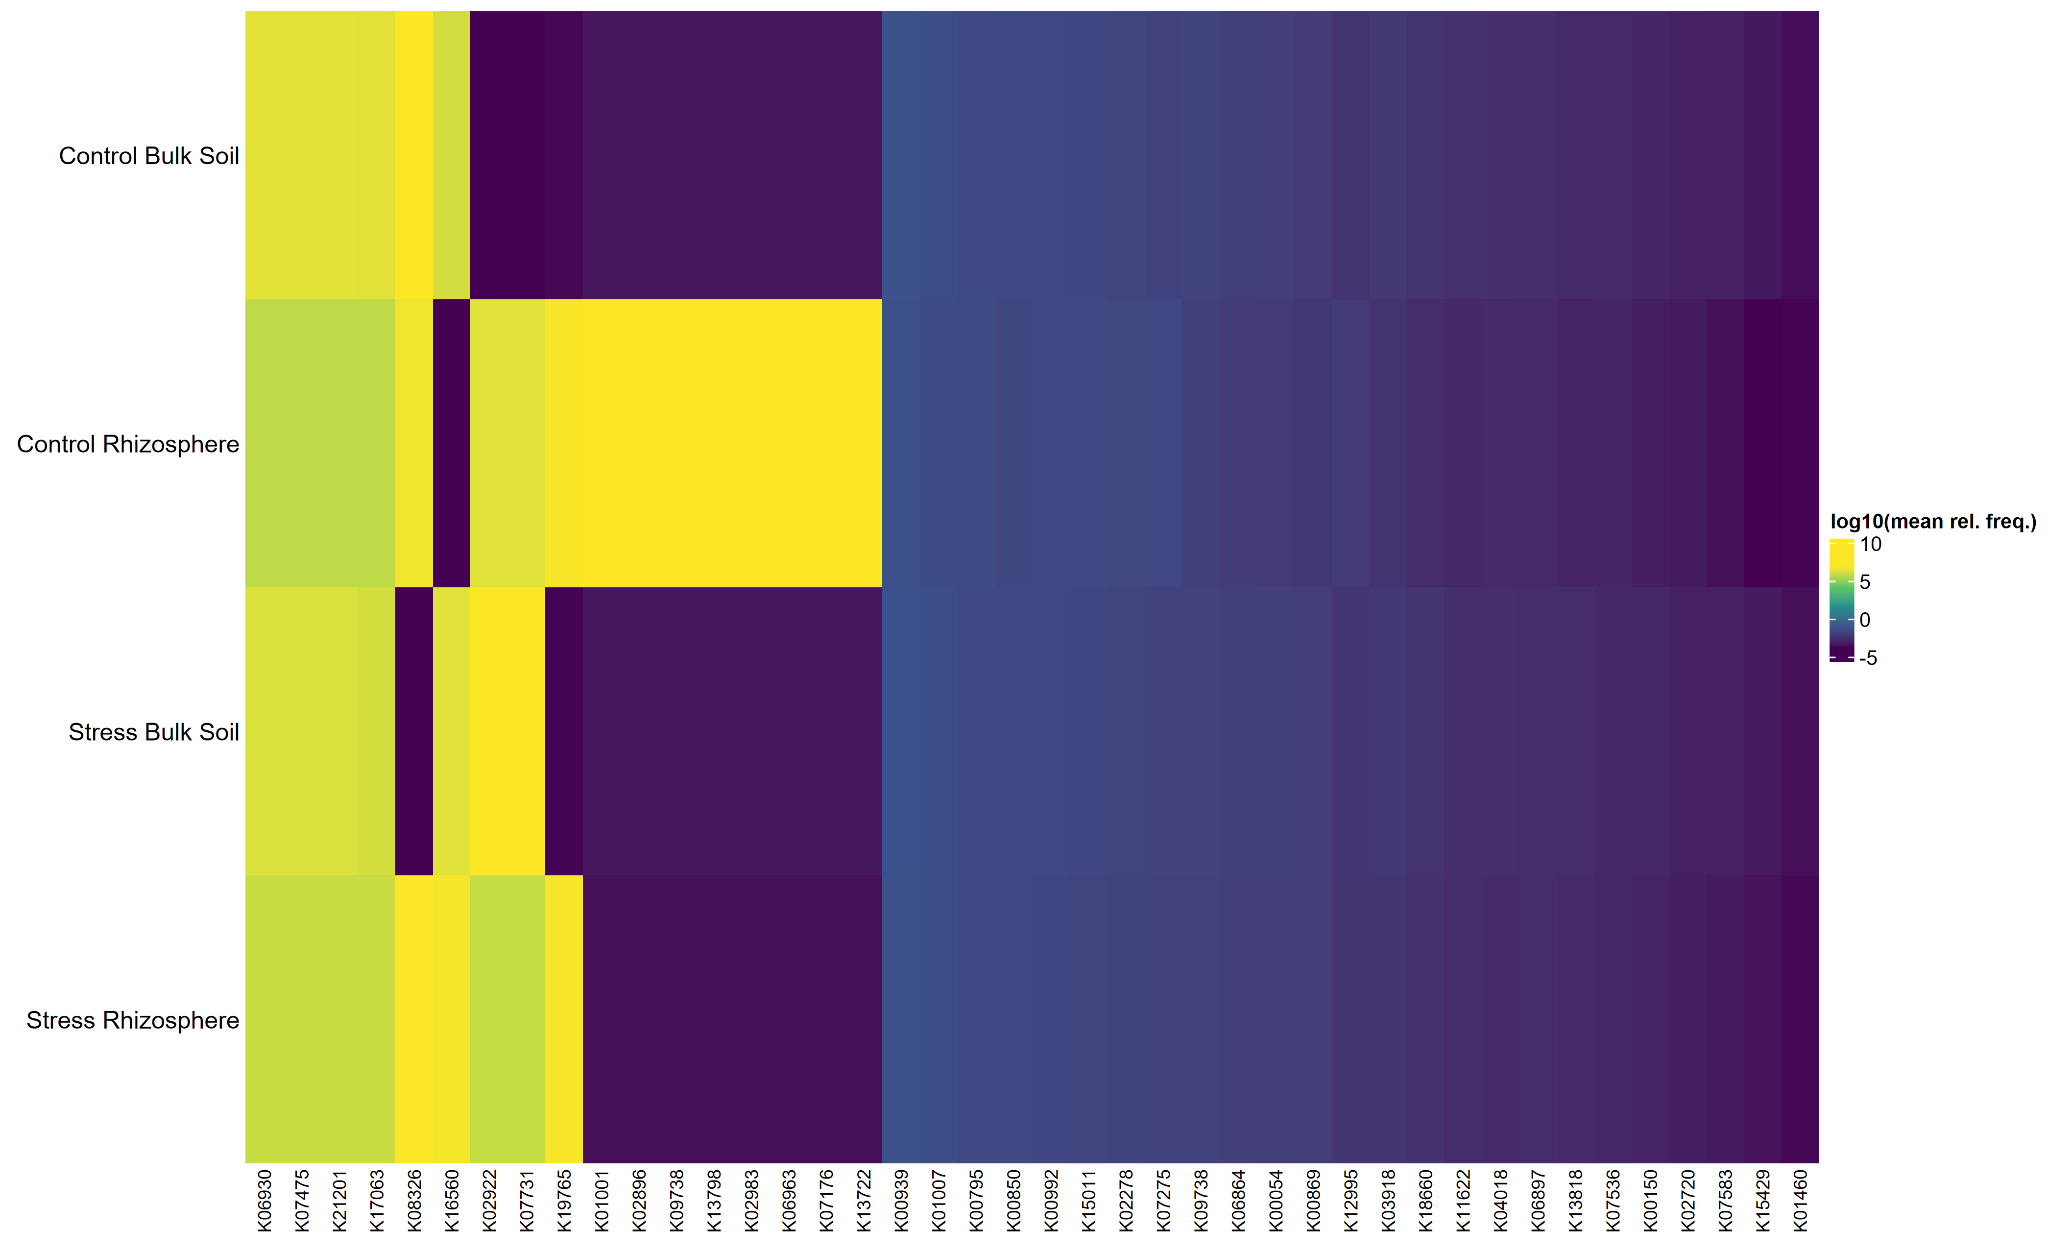
**
